# Supplementary material
Source: publisher site journal article supplement (http://www.degruyter.com/publication/journal_key/EUJAL/downloadAsset/EUJAL_EUJAL_Flyer.pdf)
Supplement: Supplementary file 1 [file EUJAL_EUJAL_Flyer.pdf]

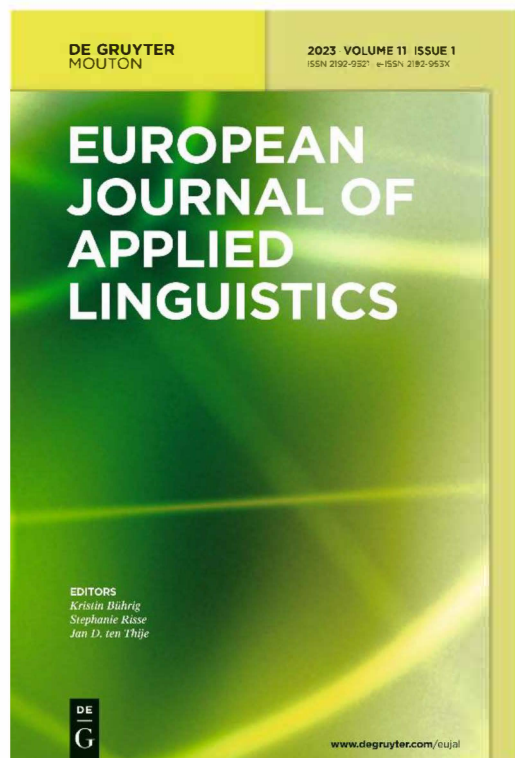

## 2 ISSUES PER YEAR

ISSN 2192-9521  
eISSN 2192-953X

## EDITORS

Kristin Bührig, University of Hamburg, Germany,  
Stephanie Risse, Libera Università di Bolzano, Italy,  
Jan D. ten Thije, Utrecht University, The Netherlands

## FOUNDING EDITOR

Karlfried Knapp, University of Erfurt, Germany

## EDITORIAL BOARD

Peter Auer, University of Freiburg, Germany,  
Kees de Bot, University of Groningen, The Netherlands,  
Jasone Cenoz, University of the Basque Country, Spain,  
Jereon Darquennes, Université de Namur, Belgium,  
Annick De Houwer, University of Erfurt, Germany,  
Guus Extra, Tilburg University, The Netherlands,  
Rita Franceschini, University of Bolzano, Italy,  
Maria del Pilar Garcia Mayo, University of the Basque Country, Spain,  
Folkert Kuiken, University of Amsterdam, The Netherlands,  
Li Wei, University College London, UK, Rosa Manchon, University of Murcia, Spain,  
Anna Mauraanen, University of Helsinki, Finland,  
Daniel Perrin, Zurich University of Applied Sciences, Switzerland, Barbara Seidlhofer, University of Vienna, Austria,  
Johannes Wagner, University of Odense, Denmark

## OBJECTIVE:

The *European Journal of Applied Linguistics (EuJAL)* focuses on the particular concerns of applied linguistics in European contexts, both by addressing problems that are typically relevant for the linguistic situation in Europe, from those on the level of the EU as a pan-national body down to the level of the individual, and by examining topics broached by or discussed in European applied linguistics in particular. In addition to resulting from an epistemological stance, EuJAL is a logical outcome of the regionalization policy of the Association Internationale de Linguistique Appliquée (AILA), supporting the societies' commitment to regionalization by focusing on the European language space and by giving applied linguists from this regional context an adequate forum. EuJAL is part of the joint activities of the European AILA affiliates.

## BENEFITS:

- ▶ Focus on Applied Linguistics relevant both for Europe and in Europe
- ▶ Timely publication of high-quality peer-reviewed articles
- ▶ Indexed in the Emerging Sciences Citation Index (ESCI) and Scopus

## Submit your paper

### Accepted article formats:

Article, Project Report, AILA Description

### Please submit your paper here:

→ <http://mc.manuscriptcentral.com/eujal>

### For further information about the submission process, please visit:

<https://www.degruyter.com/journal/key/eujal/html?lang=de#submit>
